# Supplementary figures and images for: Functional phosphoproteomic analysis reveals cold-shock domain protein A to be a Bcr-Abl effector-regulating proliferation and transformation in chronic myeloid leukemia
Source: PubMed Central journal article supplement — Cell Death Dis. 2010 Nov 4;1(11):e93–. doi: 10.1038/cddis.2010.72 (PMC3032323; doi:10.1038/cddis.2010.72), 2010-11-04

# Supplementary Figure 1

**A**

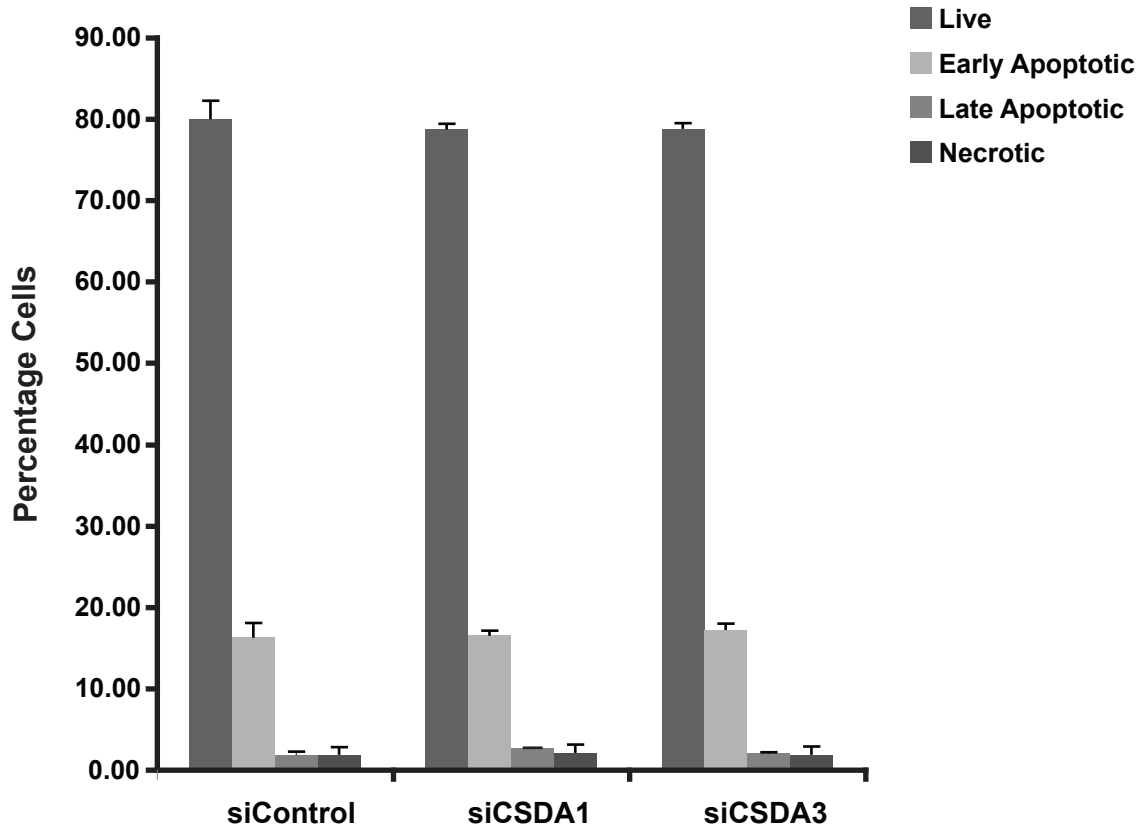

**B**

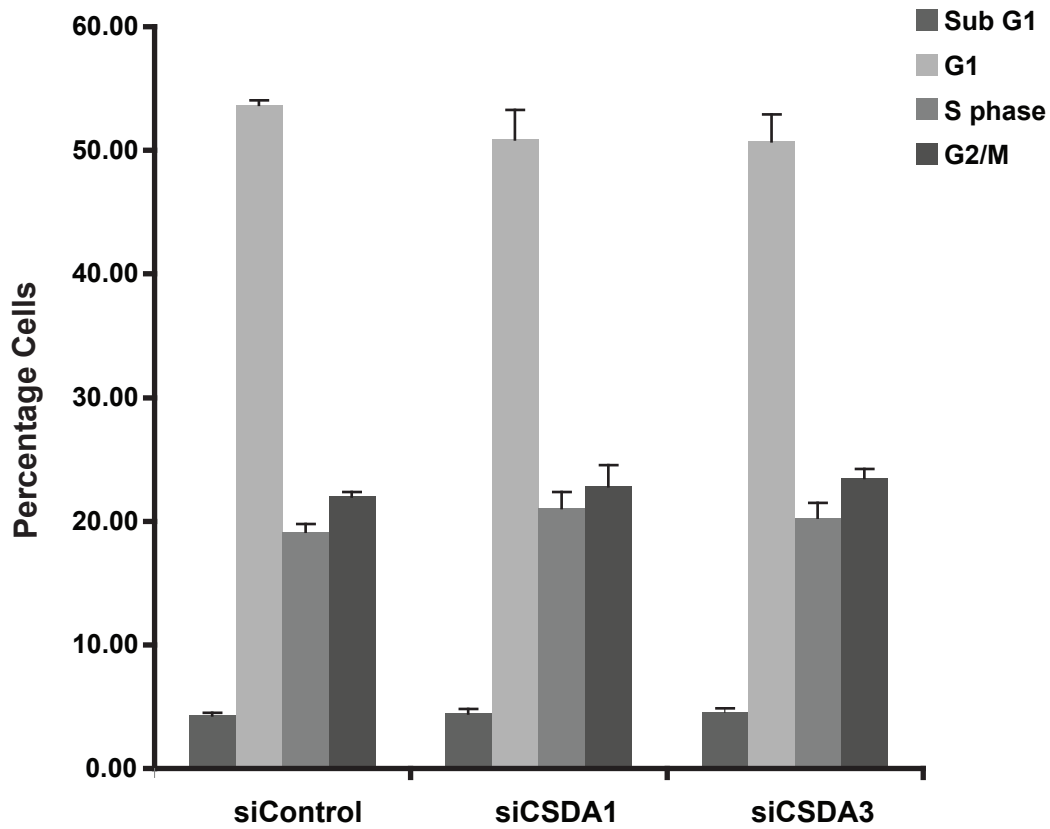

Supplement: cddis201072x1.pdf [file cddis201072x1.pdf]
